# Supplementary material for: Call of the wild rice: Oryza rufipogon shapes weedy rice evolution in Southeast Asia
Source: PubMed Central journal article supplement (PMC6304679; doi:10.1111/eva.12581), 2018-01-11

(a) VTCl: wild x landrace

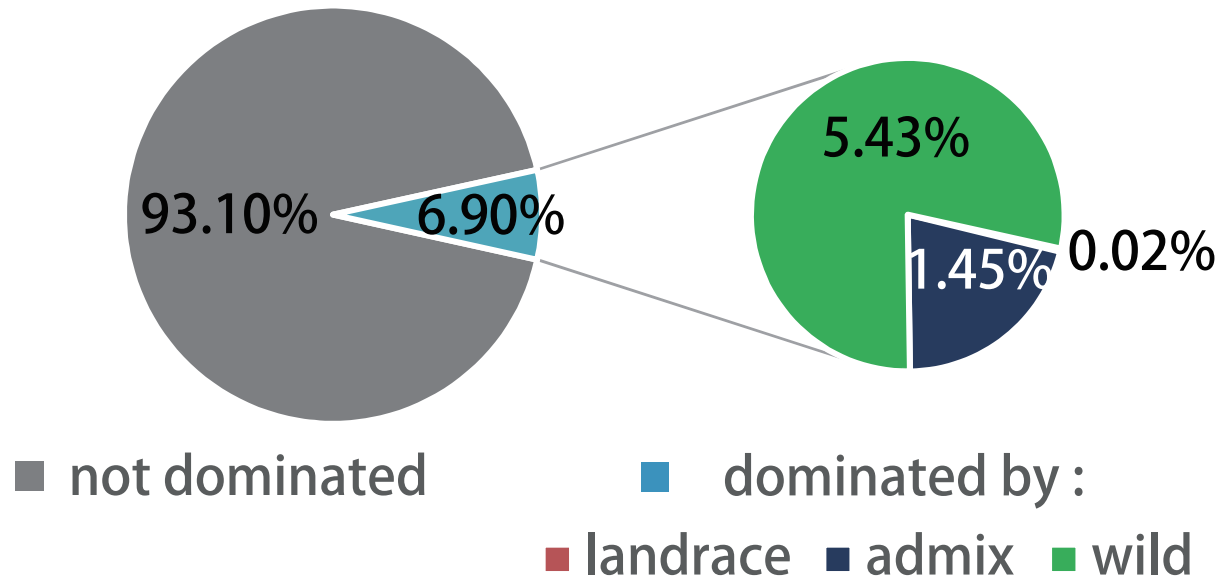

(b) Malaysia: landrace x elite

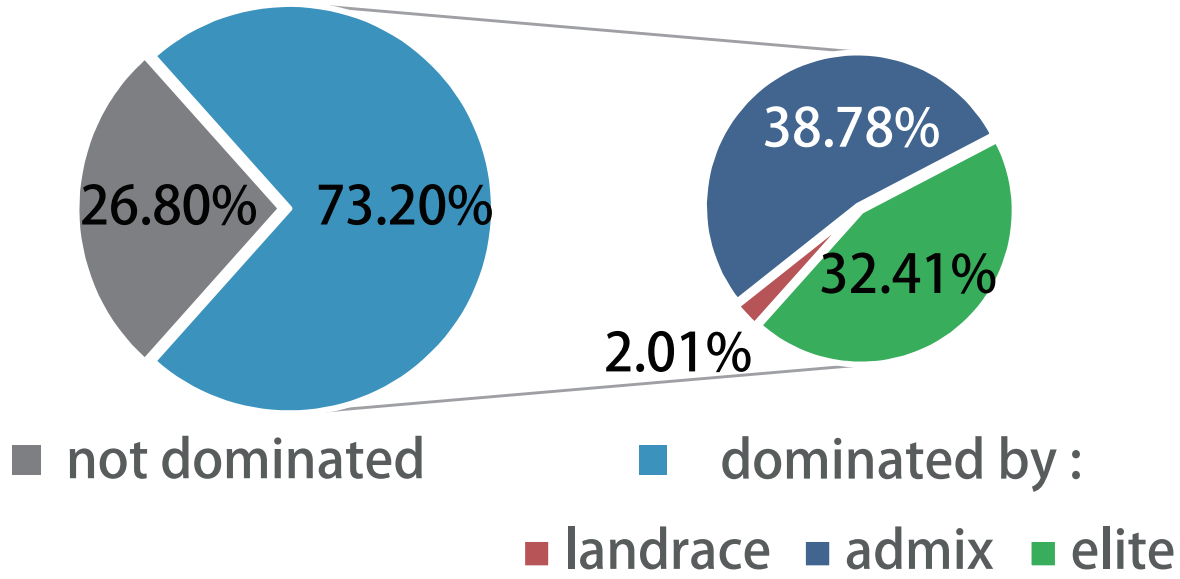

(c) Malaysia: wild x elite

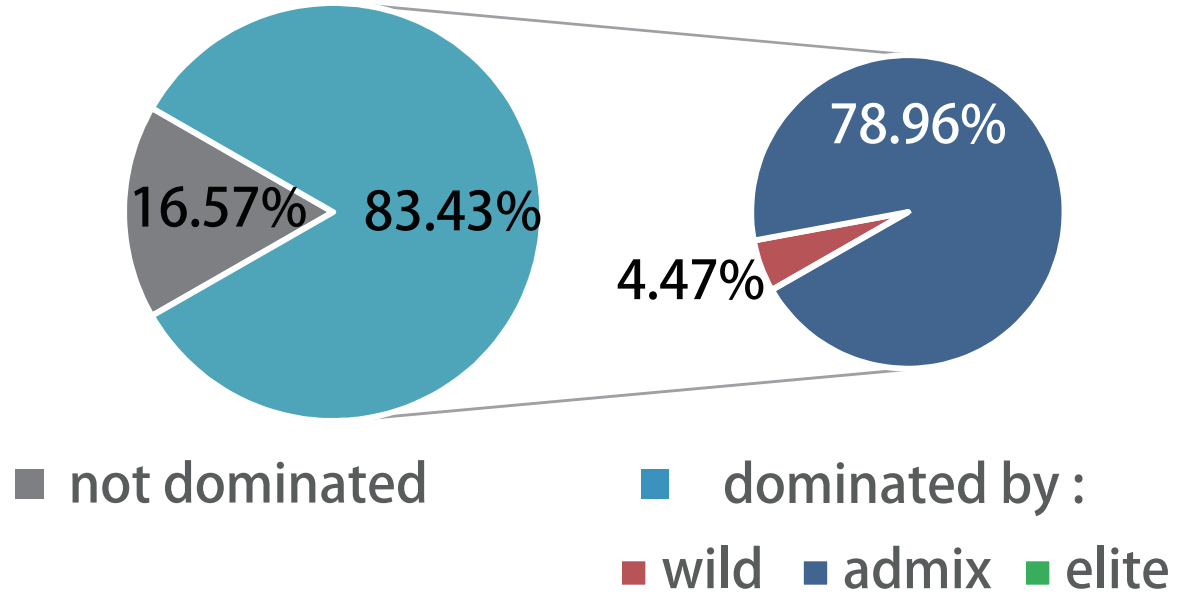

Supplement: EVA-12-93-s004.pdf [file EVA-12-93-s004.pdf]
