# Supplementary material for: Call of the wild rice: Oryza rufipogon shapes weedy rice evolution in Southeast Asia
Source: PubMed Central journal article supplement (PMC6304679; doi:10.1111/eva.12581), 2018-01-11

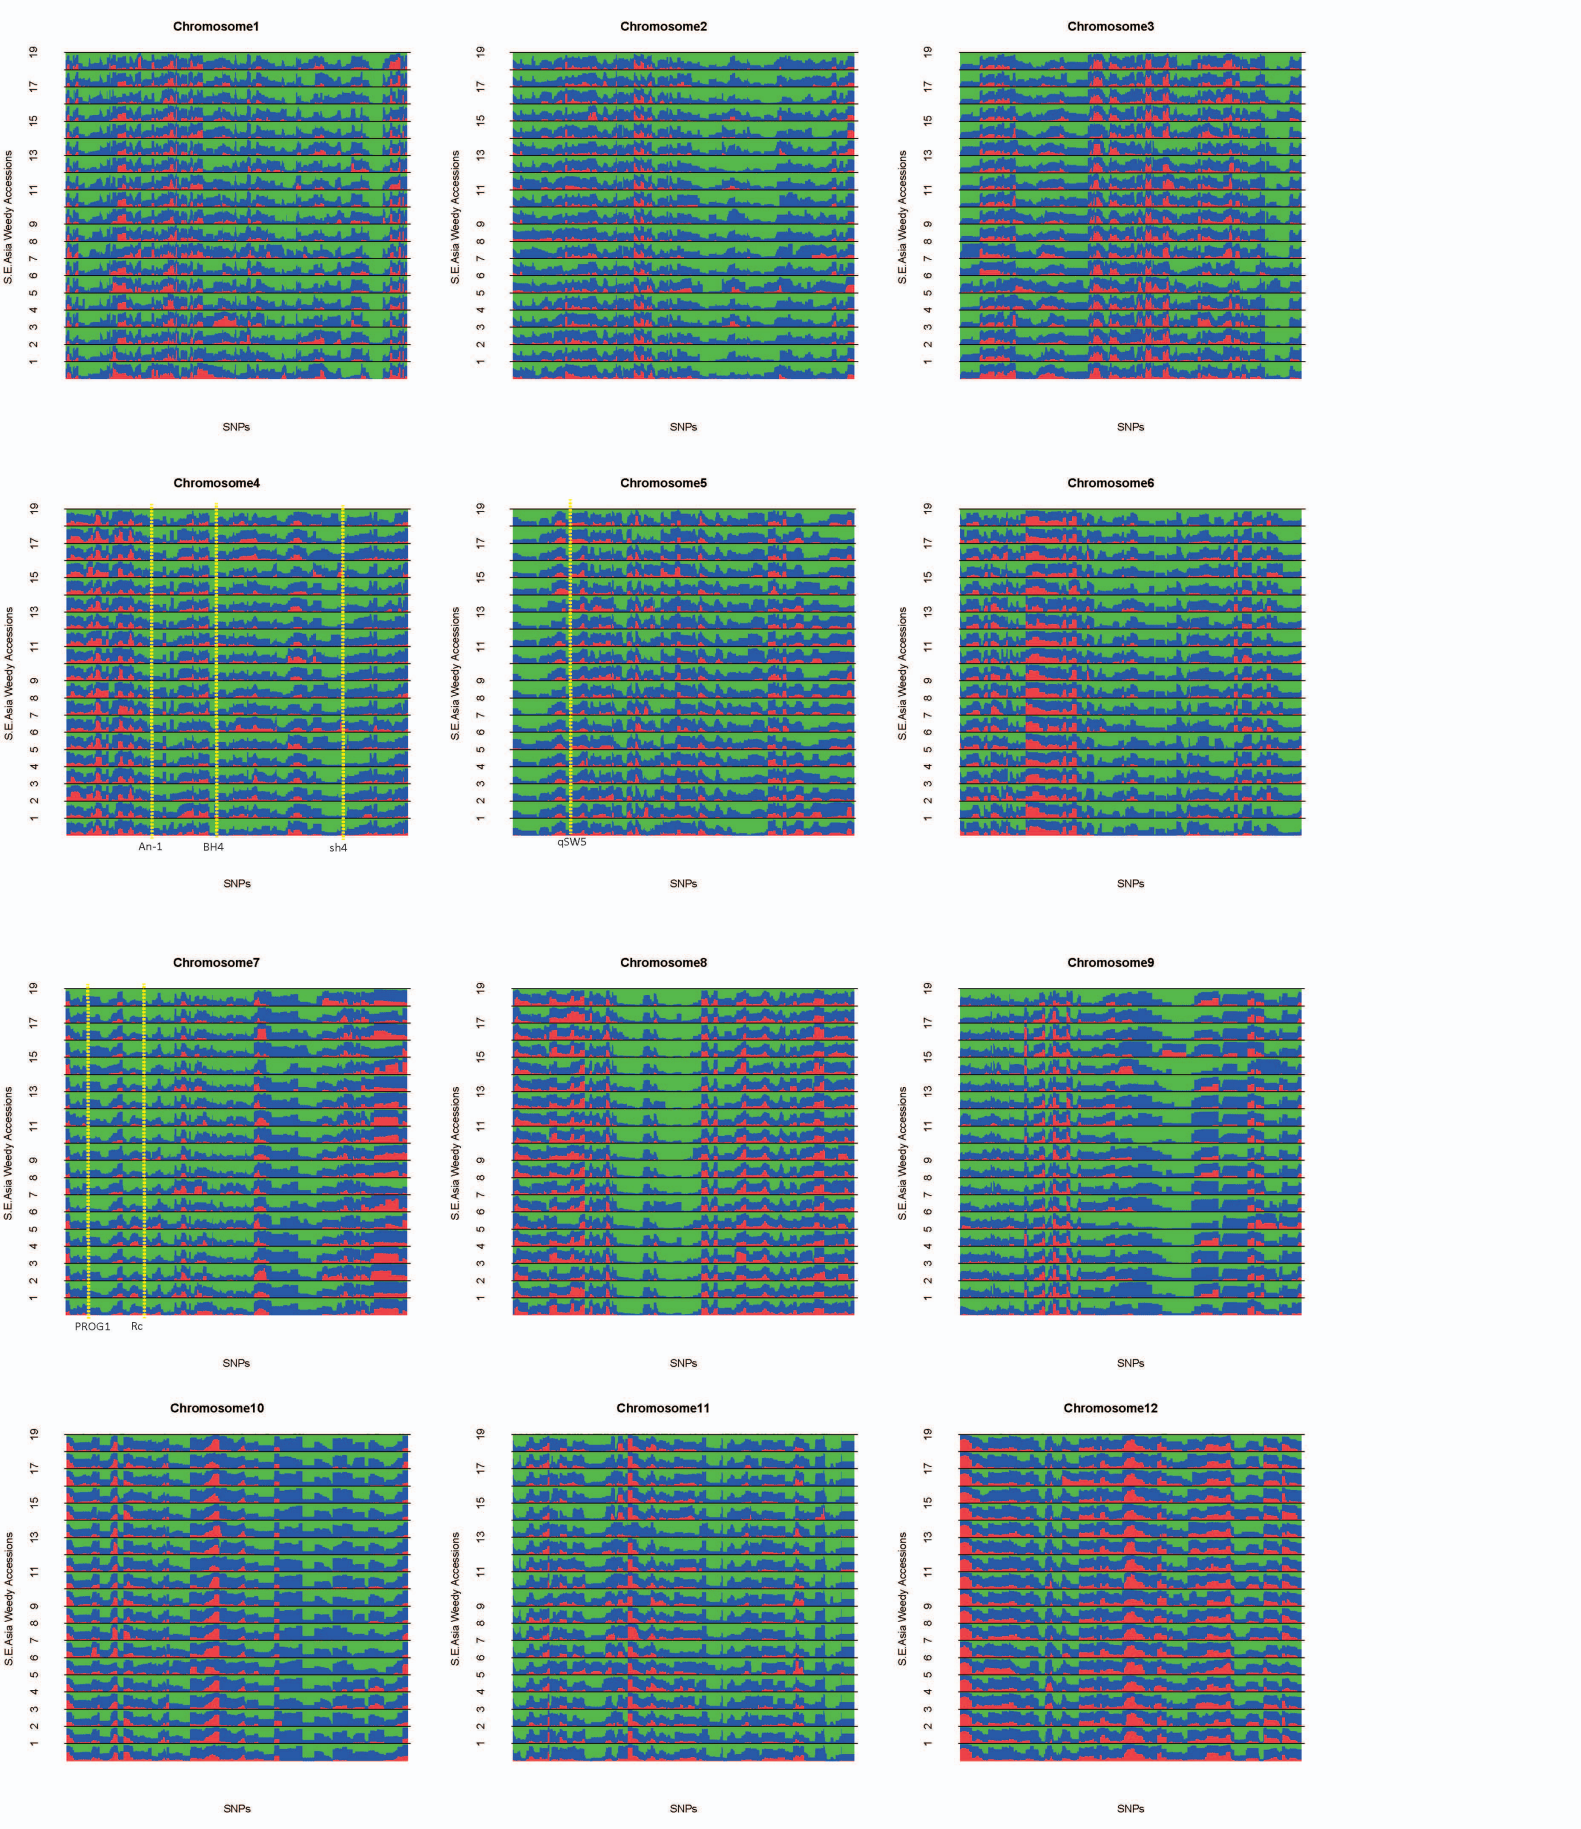

Supplement: EVA-12-93-s005.pdf [file EVA-12-93-s005.pdf]
